# Supplementary material for: High-Risk Comorbidities Drive Adverse Inpatient Outcomes After ERCP: A National Analysis and Predictive Model
Source: Research Square preprint supplement (doi:10.21203/rs.3.rs-8888800/v1), 2026-02-23

**Supplemental Table 1. ICD-10-CM codes used to identify comorbidities**

| **Condition** | **ICD-10-CM codes** |
| --- | --- |
| Type 2 diabetes | E10, E11 |
| Hypertension | I10 |
| Hyperlipidemia | E78 |
| Gastroesophageal reflux disease | K21.9, K21.0 |
| Obstructive sleep apnea | G47.3 |
| Chronic obstructive pulmonary disease | J44.9 |
| Class III+ obesity | E66.01 |
| Chronic kidney disease | N18, I29 |
| Coronary heart disease | I25.1 |
| Chronic heart failure | I50, I13.0, I13.1, I13.2, I11.0 |
| Liver cirrhosis | K70.30, K70.31, K74.60, K74.69, K76.6, K72.91, G93.40 |

**Supplemental Table 2. ICD-10-PCS codes used to define complications**

| **Category** | **Complication** | **ICD-10-PCS / ICD-10-CM codes** |
| --- | --- | --- |
| Neurological | Delirium, cerebral infarction | F05, R40.0–R40.4, I63, I97.811, I97.821 |
| Cardiovascular | Arrhythmia, arrest, MI, heart failure, arterial events | I44, I48.x, I49.x, I46, I97.12–I97.131, T81.718A–T81.711A |
| Respiratory | Ventilation, pneumothorax, other respiratory | 5A1935Z–5A1955Z, J95.811–J95.822, J81.0, J95.0–J95.9, T81.82XA |
| Gastrointestinal | Postoperative GI complications | K91.3–K95.8 |
| Infectious | Sepsis, pneumonia, wound infection | K68.11, N30.x, N39.0, R65.20–R65.21, T81.1–T81.4, A01.03–J18.x |
| Wound | SSI, dehiscence | T81.3, L76.34 |
| Hematological | Bleeding, transfusion | D78.0–N99.82, 302 |
| Venous thromboembolism | PE, DVT | I26.x, I82.x |
| Renal | Acute renal failure, GU complications | N99.0–N99.8 |

**Supplemental Figure 1.**
CONSORT diagram showing inclusion and exclusion criteria for the study cohort, with unweighted counts from the NIS dataset (2016–2022).


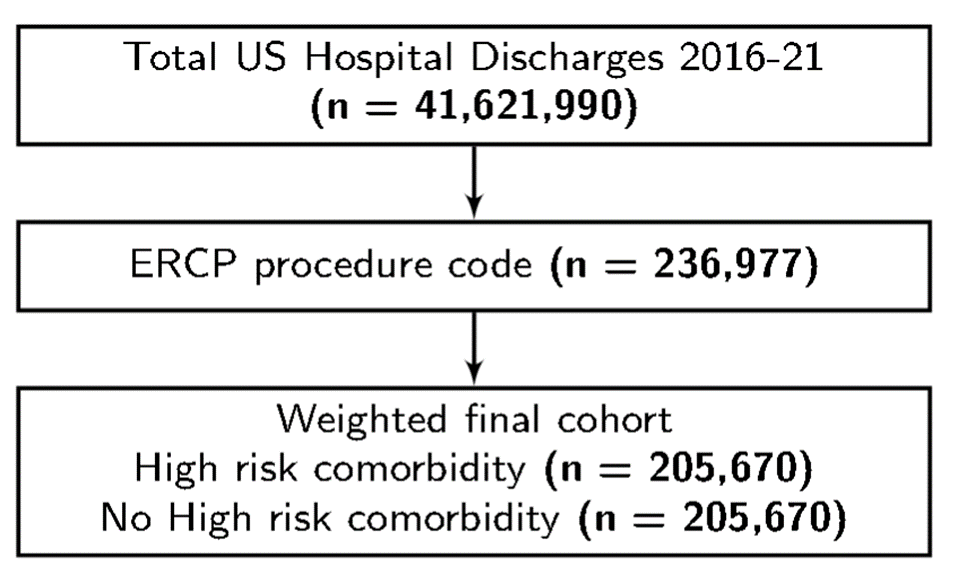

Supplement: Supplementary file 1 [file c3a6c19f158748a92ae3c926.docx]
